# Supplementary material
Source: publisher figshare collection journal article supplement (https://frontiersin.figshare.com/ndownloader/files/12417143)
Supplement: Supplementary file [file 12417143]

# The age-related perfusion pattern measured with arterial spin labeling MRI in healthy subjects

Nan Zhang, Marc L. Gordon\*, Yilong Ma, Bradley Chi, Jesus J Gomar, Shichun Peng, Peter B. Kingsley, David Eidelberg, Terry E. Goldberg

\* Correspondence: Marc L. Gordon: [mlgordon@northwell.edu](mailto:mlgordon@northwell.edu)

## Supplementary Data

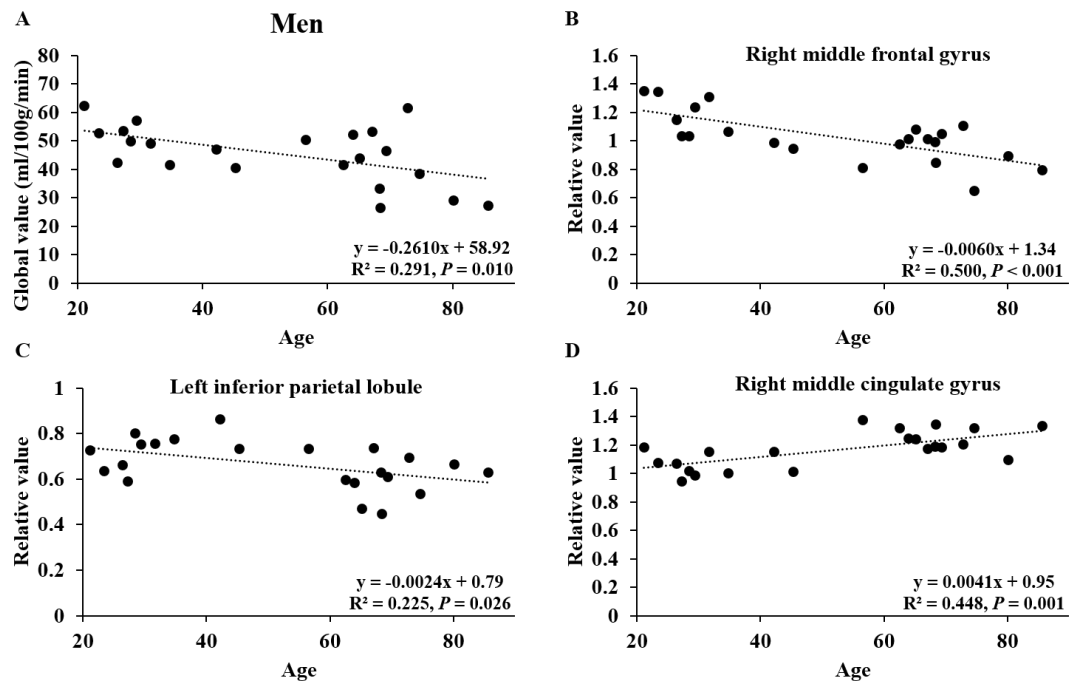

**Supplementary Figure 2.** Correlation of age with global CBF value and relative CBF values in three sample regions in male subjects. (A) The correlation between age and global value from the CBF map. (B, C, D) The correlations between age and relative values of right middle frontal gyrus, left inferior parietal lobule and right middle cingulate gyrus.
